# Supplementary material
Source: Springer Nature journal article supplement (https://www.springermedizin.de/resource/supplementary/12889_2010_2025_MOESM2_ESM.pdf/9484338)
Supplement: MOESM2 [file 9484338]

Identify Indigenous infant-mother/caregiver dyad and screen against eligibility criteria

Randomize to intervention or control groups

INTERVENTION

Baseline measures  
& Program Visit 1  
(age 5 weeks  
+/- 1 week)

Program Visit  
2  
(age 8 weeks +/- 1  
week)

Program Visit  
3  
(age 12 weeks  
+/- 1 week)

Short-term follow-up  
assessment  
(age 4 months +/- 2 weeks)

Long-term follow-up  
assessment  
(age 12 months +/- 2 weeks)

CONTROL

Baseline  
measures  
(age 5 weeks  
+/- 1 week)

Short-term follow-up  
assessment  
(age 4 months +/- 2 weeks)

Long-term follow-up  
assessment  
(age 12 months +/- 2 weeks)
